# Supplementary material
Source: PubMed Central journal article supplement (PMC8804753)
Supplement: Supplementary_Table_1__2.pdf [file Supplementary_Table_1__2.pdf]

| ROI | A           | B           | C           |
|-----|-------------|-------------|-------------|
| 1   | 44.96±3.80  | 18.30±7.25  | 31.19±15.67 |
| 2   | 63.11±24.17 | 20.47±8.57  | 30.40±18.22 |
| 3   | 37.34±24.99 | 42.11±16.20 | 34.13±21.59 |
| 4   | 68.73±32.52 | 20.54±7.51  | 29.73±17.84 |
| 5   | 30.81±15.49 | 39.99±12.50 | 33.75±19.42 |
| 6   | 27.13±17.27 | 23.55±12.08 | 50.55±25.45 |
| 7   | 29.93±16.16 | 20.94±8.70  | 57.28±27.29 |
| 8   | 27.17±12.03 | 42.85±20.44 | 42.25±27.53 |
| 9   | 28.91±17.44 | 20.07±9.03  | 31.82±17.34 |
| 10  | 31.82±17.34 | 37.84±7.42  | 28.91±17.46 |

**Table 1:** PSR image analysis of collagen alignment under PLM of superficial (A) middle (B) and deep (C) zone in newly assembled ECM.

| ROI | A           | B           | C            |
|-----|-------------|-------------|--------------|
| 1   | 56.53±34.40 | 42.98±35.50 | 75.79±47.48  |
| 2   | 64.63±26.97 | 19.95±8.22  | 68.68±36.11  |
| 3   | 48.24±42.53 | 42.54±47.26 | 82.45±62.83  |
| 4   | 48.25±25.73 | 22.76±12.29 | 63.33±50.56  |
| 5   | 27.60±24.82 | 31.00±31.40 | 60.45±38.16  |
| 6   | 30.27±13.90 | 37.79±14.58 | 72.12±62.41  |
| 7   | 49.83±35.47 | 32.14±38.25 | 109.35±60.52 |
| 8   | 25.20±8.59  | 23.13±9.95  | 51.78±47.97  |
| 9   | 19.93±23.38 | 32.09±30,70 | 75.59±39.83  |
| 10  | 30.68±10.56 | 21.67±12.23 | 77.37±44.79  |

**Table 2:** PSR image analysis of collagen alignment under PLM of superficial (A) middle (B) and deep (C) zone in articular cartilage.
